# Supplementary material for: The Aarhus Chamber Campaign on Highly Oxygenated Organic Molecules and Aerosols (ACCHA): particle formation, organic acids, and dimer esters from α -pinene ozonolysis at different temperatures
Source: Copernicus journal article supplement (doi:10.5194/acp-20-12549-2020), 2020-11-02
Supplement: Supplementary file 1 [file acp-20-12549-2020-supplement.pdf]

Supplement of Atmos. Chem. Phys., 20, 12549–12567, 2020  
<https://doi.org/10.5194/acp-20-12549-2020-supplement>  
© Author(s) 2020. This work is distributed under  
the Creative Commons Attribution 4.0 License.

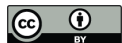

Atmospheric  
Chemistry  
and Physics  
Open Access  
EGU

*Supplement of*

**The Aarhus Chamber Campaign on Highly Oxygenated Organic Molecules and Aerosols (ACCHA): particle formation, organic acids, and dimer esters from  $\alpha$ -pinene ozonolysis at different temperatures**

**Kasper Kristensen et al.**

*Correspondence to:* Kasper Kristensen ([kasper.kristensen@eng.au.dk](mailto:kasper.kristensen@eng.au.dk)) and Merete Bilde ([bilde@chem.au.dk](mailto:bilde@chem.au.dk))

The copyright of individual parts of the supplement might differ from the CC BY 4.0 License.

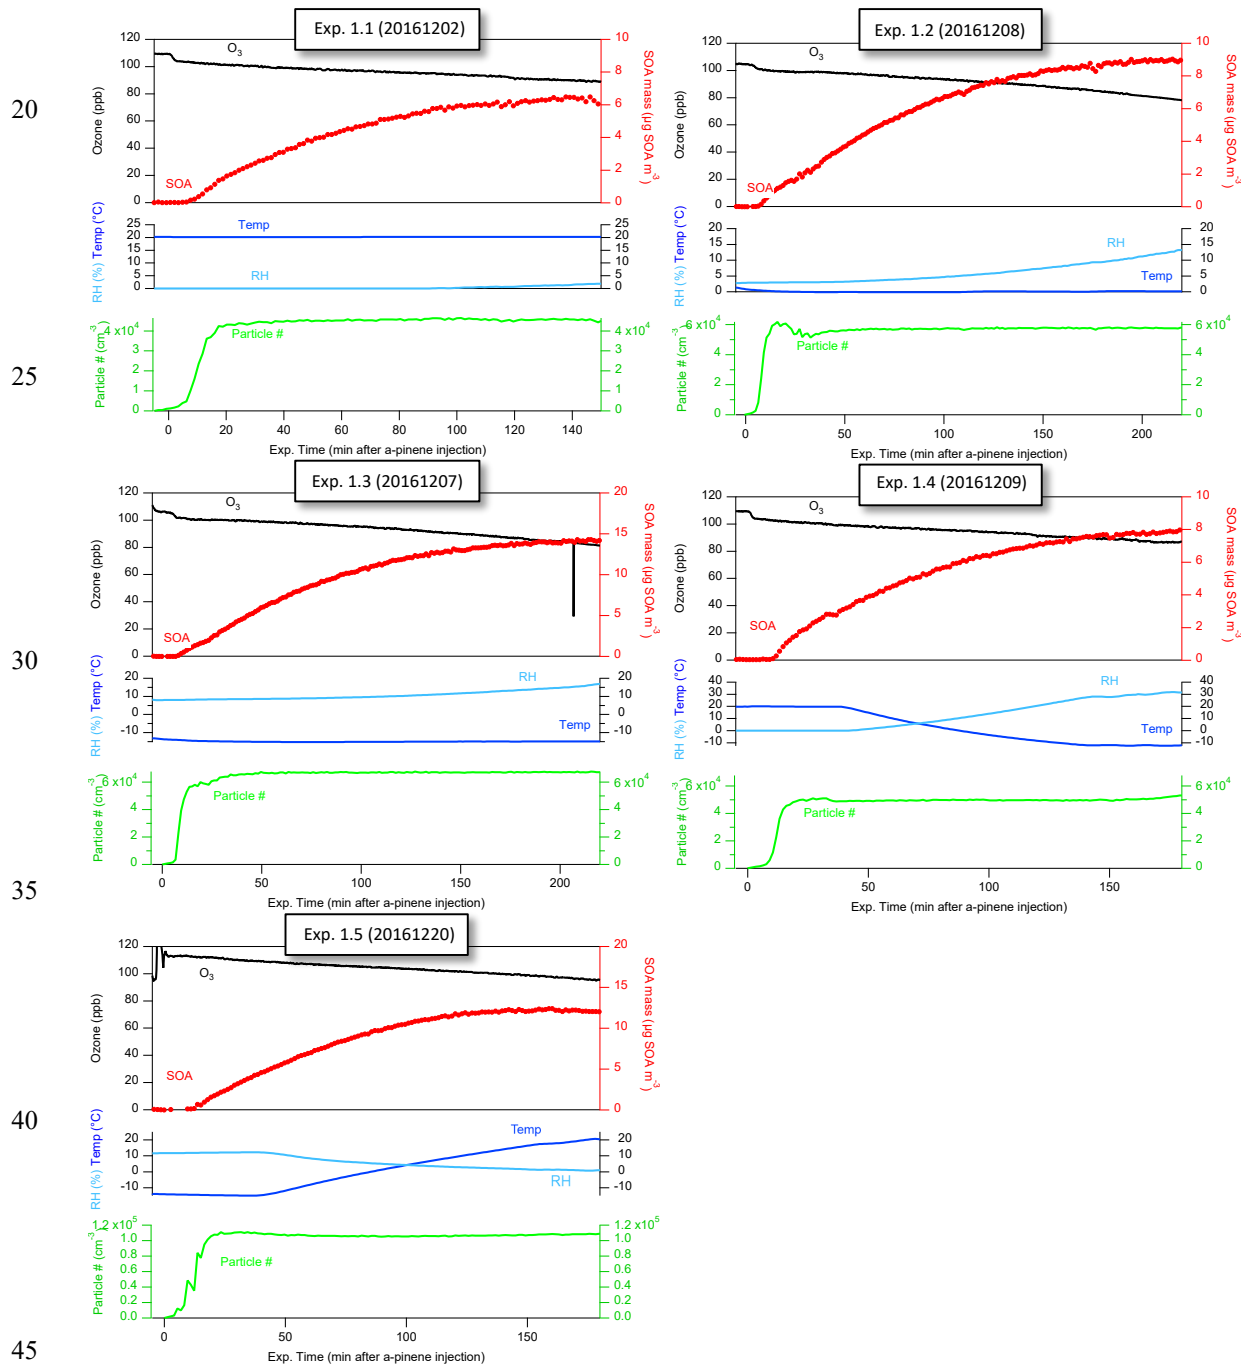

**Figure S1.** Concentration of  $O_3$  (ppb, black) and wall-loss corrected SOA mass ( $\mu\text{g m}^{-3}$ , red) and particle number ( $\text{cm}^{-3}$ , green, particle diameter: 10-400 nm, measured by SMPS) along with recorded RH (%) and Temperature ( $^{\circ}\text{C}$ , blue) during 10 ppb  $\alpha$ -pinene oxidation experiments (Exp. 1.1-1.5)

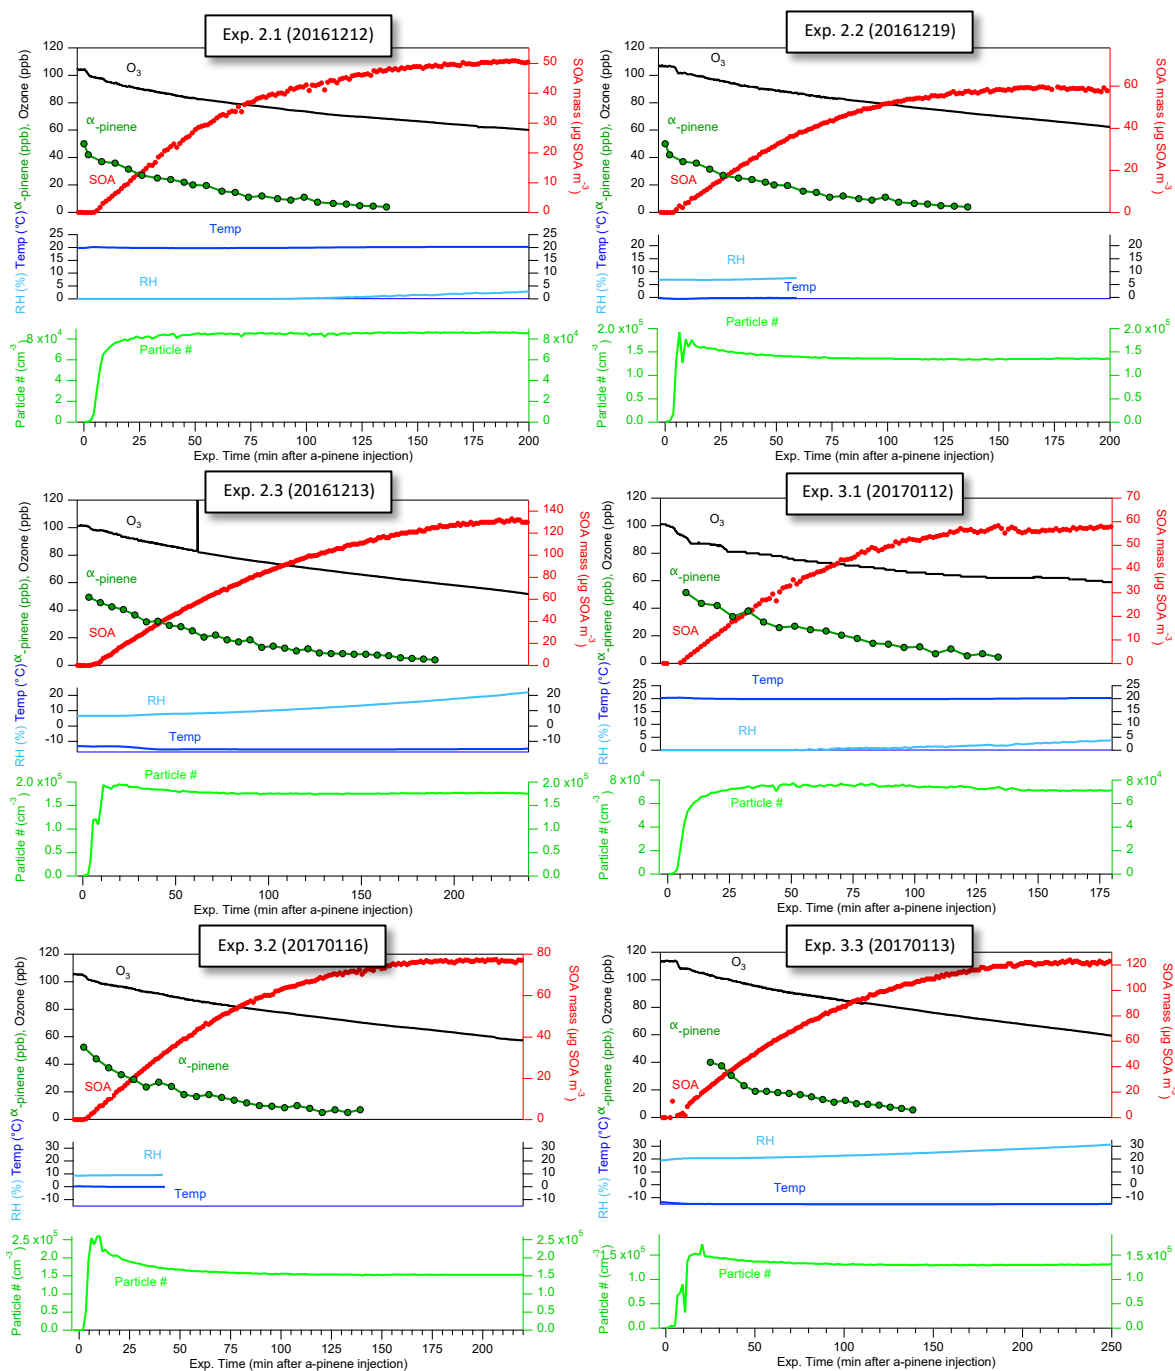

50

**Figure S2.** Concentration of  $O_3$  (ppb, black),  $\alpha$ -pinene (ppb, dark green), and wall-loss corrected SOA mass ( $\mu\text{g m}^{-3}$ , red) and particle number ( $\text{cm}^{-3}$ , green, particle diameter: 10–400 nm, measured by SMPS) along with recorded RH (%) and temperature ( $^{\circ}\text{C}$ , blue) during 50 ppb  $\alpha$ -pinene oxidation experiments (Exp. 2.1–2.3 & 3.1–3.).

55

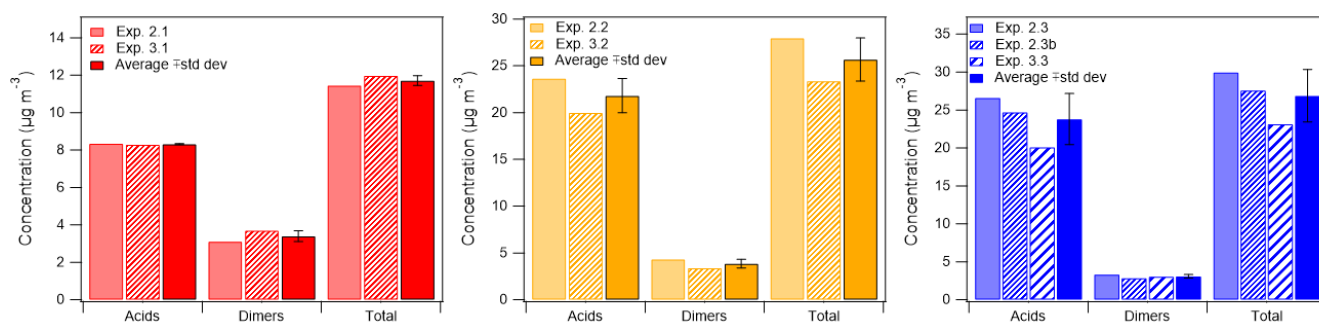

**Figure S3.** Concentrations ( $\mu\text{g m}^{-3}$ ) of acids and dimers from UHPLC/ESI-qTOF-MS analysis of repeated experiments performed at 50 ppb  $\alpha$ -pinene and 20 °C (Exp. 2.1 & 3.1), 0 °C (Exp. 2.2 & 3.2) and -15 °C (Exp. 2.3a, 2.3b & 3.3). Bars to the right (dark colored) represent average concentrations and associated standard deviations.

60

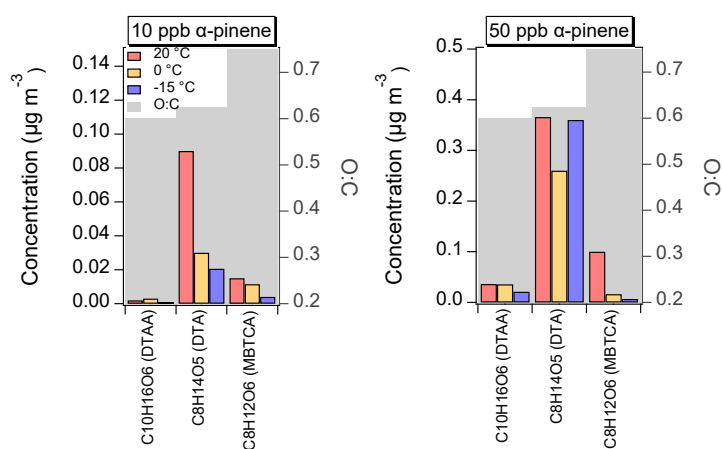

**Figure S4.** O:C-ratios and concentrations ( $\mu\text{g m}^{-3}$ ) of DTAA, DTA and MBTCA in SOA particles from 10 and 50 ppb  $\alpha$ -pinene oxidation experiments performed at 20, 0, and -15 °C (Exp. 1.1-1.3 and Exp. 2.1-2.3).

65

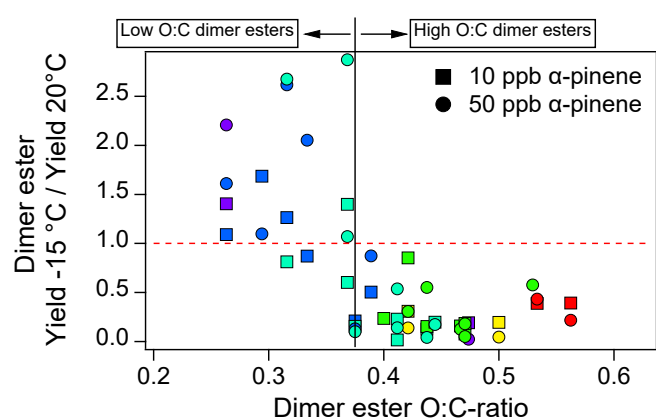

**Figure S5.** Comparison of relative yields (yield at -15 °C / yields at 20 °C) for specific dimer esters as a function of dimer ester O:C ratio in 10 and 50 ppb  $\alpha$ -pinene ozonolysis experiments. Vertical line indicates the O:C value (0.38) above which all dimer esters show a decrease in concentration at -15 °C compared to 20 °C.

70

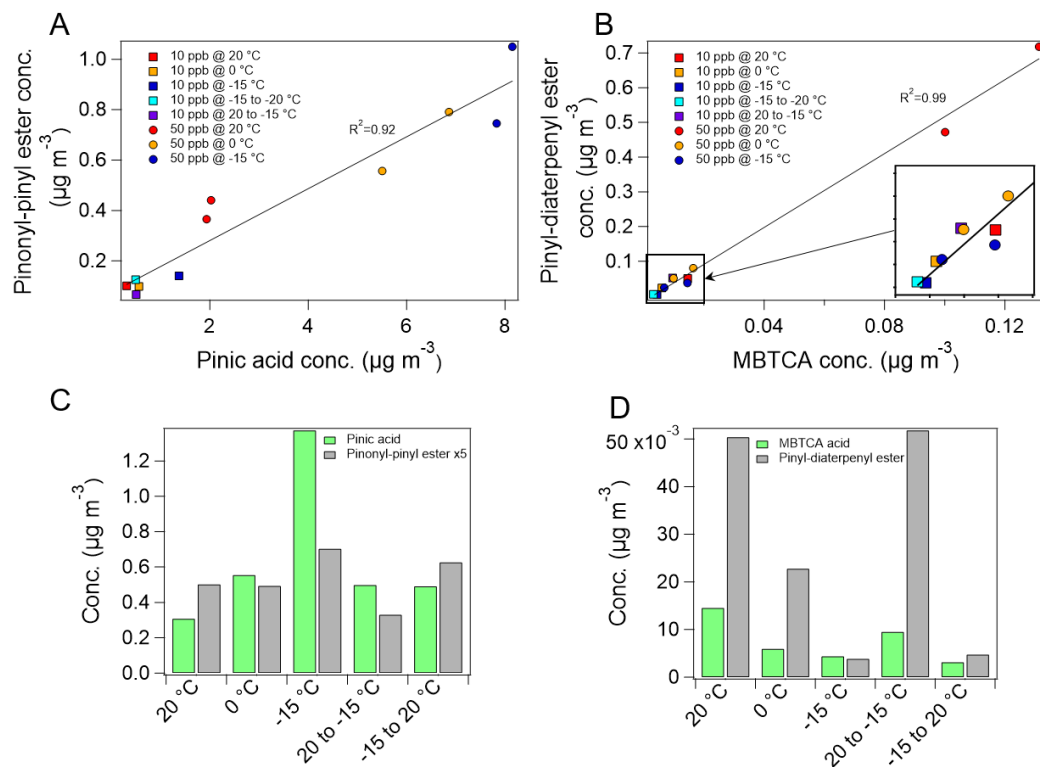

**Figure S6. A)** Correlation plot of pinonyl-pinyl ester conc. ( $\mu\text{g m}^{-3}$ ) and pinic acid ( $\mu\text{g m}^{-3}$ ) across all conducted experiments. **B)** Correlation plot of piny-diterpenyl ester conc. ( $\mu\text{g m}^{-3}$ ) and MBTCA ( $\mu\text{g m}^{-3}$ ) across all conducted experiments. **C)** Conc. ( $\mu\text{g m}^{-3}$ ) of pinonyl-pinyl ester conc. and pinic acid in SOA particle formed from 10 ppb oxidation experiments performed at 20, 0, and -15 °C and during temperature ramping (20 to -15 °C & -15 to 20 °C). **D)** Conc. ( $\mu\text{g m}^{-3}$ ) of piny-diterpenyl ester conc. and MBTCA in SOA particle formed from 10 ppb oxidation experiments performed at 20, 0, and -15 °C and during temperature ramping (20 to -15 °C & -15 to 20 °C)
